# Supplementary material for: Improvement of Verticillium Wilt Resistance by Applying Arbuscular Mycorrhizal Fungi to a Cotton Variety with High Symbiotic Efficiency under Field Conditions
Source: PubMed Central journal article supplement (PMC5796189; doi:10.3390/ijms19010241), 2018-01-13
Supplement: ijms-19-00241-s001.pdf [file ijms-19-00241-s001.pdf]

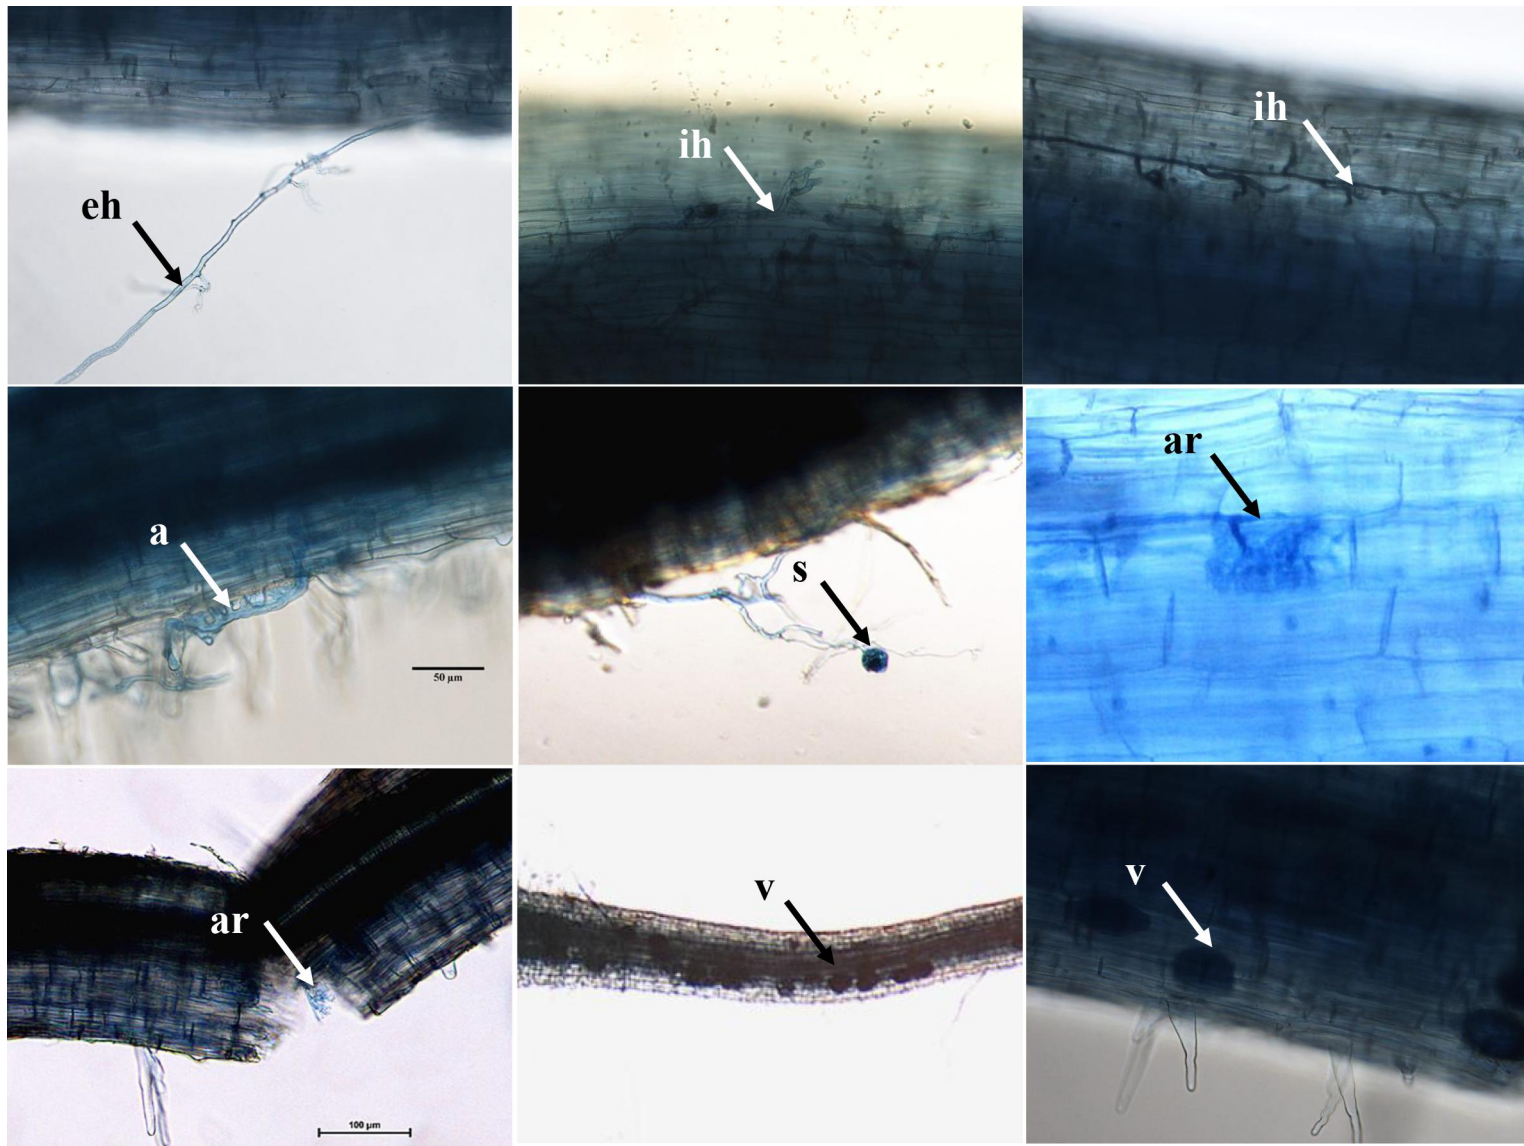

**Figure S1.** The morphology of cotton roots associated with arbuscular mycorrhizal fungi at 40 dpi. eh, extraradical hyphae; ih, intraradical hyphae; a, appressorium; s, spore; ar, arbuscules; v, vesicle.

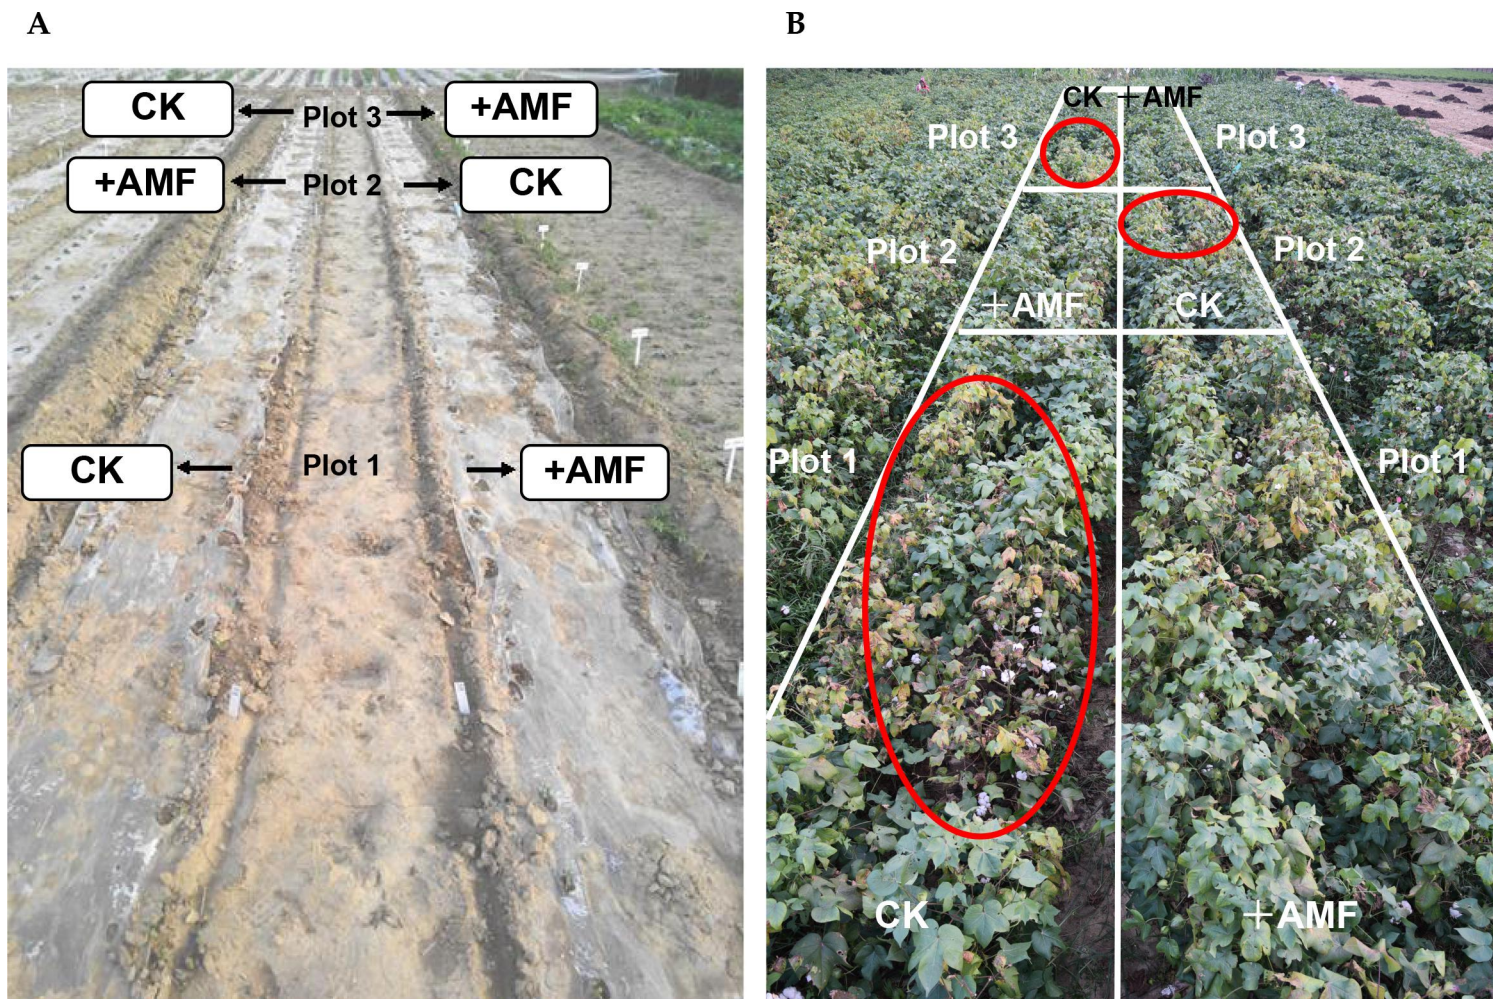

**Figure S2.** Experimental design and cotton wilt disease centers in the field in 2016. (A) Experimental design to test the PGP and Verticillium wilt resistance by applying AMF. The experimental design was a complete randomized block (three mycorrhiza-treated plots and three control plots). Each plot was 8 meters (m) length and 1m in width (with a 1m interval between blocks), and 50 plants were planted in two rows in each plot. Plot 1, Plot 2 and Plot 3 were used to refer to three repetitions. To ensure the direct contact of the seedling roots with *R. irregularis* CD1, we added a suspension of approximately 1,000 spores near each seed, 3 cm under the surface of the soil. The matched controls were given the equivalent volume of blank M- suspension. (B) Disease centers in the field. In September, 2016 (at 120 dpi), we noticed three obvious disease centers, which were exactly distributed among the three control plots. Analogous design but different place was also used in 2015.

**Table S1.** Effects of AMF on the growth promotion of Lumian 1 at 55 and 72 dpi under field conditions.

| Year | Plot  | Mycorrhizal colonization | Plant height at 55 dpi (cm) | Stem diameter at 55 dpi (mm) | Plant height at 72 dpi (cm) | Stem diameter at 72 dpi (mm) |
|------|-------|--------------------------|-----------------------------|------------------------------|-----------------------------|------------------------------|
| 2015 | Plot1 | —                        | 57.06±8.27 c                | 9.20±1.99 b                  | 113.28±7.27 c               | 14.33±1.12 c                 |
|      |       | +                        | 60.77±5.66 ab               | 9.83±1.18 b                  | 120.42±5.60 ab              | 15.45±0.79 ab                |
|      | Plot2 | —                        | 56.49±8.63 c                | 10.57±1.15 a                 | 114.29±7.03 c               | 15.35±0.84 b                 |
|      |       | +                        | 60.53±5.08 ab               | 10.60±1.35 a                 | 119.14±4.29 b               | 15.40±0.96 b                 |
|      | Plot3 | —                        | 57.72±6.67 bc               | 9.86±2.37 b                  | 115.26±5.02 c               | 15.08±1.17 b                 |
|      |       | +                        | 62.94±9.43 a                | 10.94±1.00 a                 | 123.04±8.34 a               | 16.10±1.00 a                 |
| 2016 | Plot1 | —                        | 38.78±3.76 bc               | 9.21±1.81 c                  | 111.73±4.63 c               | 14.10±1.12 c                 |
|      |       | +                        | 39.86±4.14 abc              | 9.4±1.64 bc                  | 114.04±4.97 bc              | 14.92±0.71 b                 |
|      | Plot2 | —                        | 38.22±3.40 c                | 9.18±1.67 c                  | 113.73±4.08 c               | 14.85±1.17 b                 |
|      |       | +                        | 41.64±2.98 ab               | 10.09±1.71 ab                | 117.42±5.60 ab              | 15.53±1.12 a                 |
|      | Plot3 | —                        | 38.74±4.33 bc               | 9.38±1.69 bc                 | 112.26±5.02 bc              | 14.87±1.16 b                 |
|      |       | +                        | 42.34±4.91 a                | 10.25±1.54 bc                | 119.08±6.56 a               | 15.87±1.00 a                 |

Mean values within columns of same year followed by different letters are significantly different at  $P<0.05$ . Error bars represent  $\pm$ SD.

**Table S2.** qRT-PCR Primers used in this study.

| <b>Gene name</b>   |         | <b>Primer sequences</b>          |
|--------------------|---------|----------------------------------|
| <i>Gh_A02G0202</i> | Forward | 5'-TCAATGCGGAACAAGAGAAG-3'       |
|                    | Reverse | 5'-CCGCAGAGTGCAATAAGTGT-3'       |
| <i>Gh_A02G0203</i> | Forward | 5'-CTTGCCATCCCTTACCAGCA-3'       |
|                    | Reverse | 5'-CCCTTTTTGTCCTTGATTTTGGC-3'    |
| <i>Gh_D02G0263</i> | Forward | 5'-TGCTGCACAAAGCACACATC-3'       |
|                    | Reverse | 5'-GCTCTGCTGGTGCCCATAT-3'        |
| <i>Gh_D10G1372</i> | Forward | 5'-ATCGCTTATCGCACTTTGTG-3'       |
|                    | Reverse | 5'-ATTGAATTGTGAACCTGCCA-3'       |
| <i>GhUBQ7</i>      | Forward | 5'-GAAGGCATTCCACCTGACCAAC-3'     |
|                    | Reverse | 5'-CAAAACTCCAAAATCATACCCAAAG-3'  |
| <i>V. dahliae</i>  | Forward | 5'-AAAGTTTTAATGGTTCGCTAAGA-3'    |
|                    | Reverse | 5'-CTTGGTCATTTAGAGGAAGTAA-3'     |
| <i>GhHSR203J</i>   | Forward | 5'-GTGATAGCTCAGGAGGGAACAT-3'     |
|                    | Reverse | 5'-CTAACTCGGACTTGCTTCGTTG-3'     |
| <i>GhHIN1-F</i>    | Forward | 5'-GCTGATGAGACATCGGAGTTTA-3'     |
|                    | Reverse | 5'-CTACCATTCCCAGTGTTCAAAG-3'     |
| <i>GhNPR1-F</i>    | Forward | 5'-TCAGTTTAGACAAGCCCGAGAA-3'     |
|                    | Reverse | 5'-CGTATGACCCTCTTTCAGTAGCA-3'    |
| <i>GhPR1</i>       | Forward | 5'-AGACTACCTCAACGCTCACAACAC-3'   |
|                    | Reverse | 5'-CAACCCACATATTTACAGCATCG-3'    |
| <i>GhPR3</i>       | Forward | 5'-CGTGGTGCCTTGCCTATCTATTG-3'    |
|                    | Reverse | 5'-GCGTCGTTCTTGGTCGGTTTC-3'      |
| <i>GhPR4</i>       | Forward | 5'-CGGGGTGTTCTTGATGCTC-3'        |
|                    | Reverse | 5'-TTACGCTCCACCGTCCTCTTC-3'      |
| <i>GhPR5</i>       | Forward | 5'-GCCAGGGATTCTATCAAACGC-3'      |
|                    | Reverse | 5'-ATCCTCGGAGCAATGGGTTC-3'       |
| <i>GhPR9</i>       | Forward | 5'-CCCAACTGTGAGCGAGGAAT-3'       |
|                    | Reverse | 5'-GGCGACGACACCAGCAAG-3'         |
| <i>GhPR10</i>      | Forward | 5'-ATGACTCTGCCTCCCCTGACG-3'      |
|                    | Reverse | 5'-CCCGCCTTCAATCTAACTGTATCTG-3'  |
| <i>GhPAL5</i>      | Forward | 5'-CCAAGTGGCTAAAAGAGTCCTAACA-3'  |
|                    | Reverse | 5'-GGTCGTCGGCGTAGGCATAGA-3'      |
| <i>GhC4H1</i>      | Forward | 5'-CCGAACCCGACACCCATAAGC-3'      |
|                    | Reverse | 5'-GCAGGGATGTCATACCCACCAAG-3'    |
| <i>GhHCT1</i>      | Forward | 5'-CCTGGTACTTTGGGAATGTGAT-3'     |
|                    | Reverse | 5'-CCTTAGATATTCATCATCCATCCGA-3'  |
| <i>Gh4CL1</i>      | Forward | 5'-GTGTCTTGCCTTTATTCCACATTTAC-3' |
|                    | Reverse | 5'-TTCTTAGCCAACAACACCACCAAC-3'   |
| <i>GhCAD1</i>      | Forward | 5'-GACTTTGGTAGTTGTGGGGGC-3'      |
|                    | Reverse | 5'-GAGACGCAAGAAATGATGGATGT-3'    |
| <i>GhLOX1</i>      | Forward | 5'-TGATGGACTGGAGATTTGGTTTG-3'    |
|                    | Reverse | 5'-GCTTGAAGTTCAGGGTCTTGTTG-3'    |
| <i>GhACO1</i>      | Forward | 5'-CTCCCAAGCCCACAAAAGTT-3'       |
|                    | Reverse | 5'-ACAGAGTCCAGCCGTGATGC-3'       |
| <i>GhOPR3</i>      | Forward | 5'-TGGAAGATGATTGTGGATGCTG-3'     |
|                    | Reverse | 5'-GAGATGGGTTTGTTTGTTGAGGA-3'    |
